# Supplementary material for: Is Airborne 2,4,6-Trichloroanisole (TCA) a Threat for Bottled Wine?
Source: Hindawi journal article supplement (doi:10.1155/2023/6637804), 2023-11-13
Supplement: f1 [file 6637804.f1.pdf]

**Supplementary Table 1.** Results of ANOVA (or Kruskal-Wallis test) for  $d_5$ -TCA values in wines grouped according to the types of bottle closures. The presented values are means of three replicates  $\pm$  standard deviations. Small letters denote significant differences in ANOVA according to the Tukey's test (ns>0.05; \* $p \leq 0.05$ ; \*\* $p < 0.01$ ; \*\*\* $p < 0.001$ )

| Type of closure                          | Storage time | $d_5$ -TCA in wine (ng/L)<br>at <i>Medium conditions</i> | Significance in ANOVA<br>(in Kruskal-Wallis test) <sup>1</sup> | $d_5$ -TCA in wine (ng/L)<br>at <i>Intense conditions</i> | Significance in ANOVA<br>(in Kruskal-Wallis test) <sup>1</sup> |
|------------------------------------------|--------------|----------------------------------------------------------|----------------------------------------------------------------|-----------------------------------------------------------|----------------------------------------------------------------|
| <b>Natural cork<br/>HQ</b>               | 6 months     | nd                                                       | na <sup>2</sup>                                                | nd                                                        | na <sup>2</sup>                                                |
|                                          | 12 months    | nd                                                       |                                                                | nd                                                        |                                                                |
|                                          | 24 months    | nd                                                       |                                                                | nd                                                        |                                                                |
| <b>Natural cork<br/>BQ</b>               | 6 months     | nd                                                       |                                                                | nd                                                        |                                                                |
|                                          | 12 months    | nd                                                       |                                                                | nd                                                        |                                                                |
|                                          | 24 months    | nd                                                       |                                                                | nd                                                        |                                                                |
| <b>Agglomerated cork<br/>HQ</b>          | 6 months     | nd                                                       |                                                                | nd                                                        |                                                                |
|                                          | 12 months    | nd                                                       |                                                                | nd                                                        |                                                                |
|                                          | 24 months    | nd                                                       |                                                                | nd                                                        |                                                                |
| <b>Agglomerated cork<br/>BQ</b>          | 6 months     | nd                                                       |                                                                | nd                                                        |                                                                |
|                                          | 12 months    | nd                                                       |                                                                | nd                                                        |                                                                |
|                                          | 24 months    | nd                                                       |                                                                | nd                                                        |                                                                |
| <b>Synthetic stopper<br/>Low OTR</b>     | 6 months     | nd                                                       | *                                                              | nd                                                        | (Factor Closure $p=0.059$<br>Factor Time $p<0.001$ )           |
|                                          | 12 months    | nd                                                       |                                                                | 12.1 $\pm$ 2.0                                            |                                                                |
|                                          | 24 months    | nd                                                       |                                                                | 22.7 $\pm$ 3.3                                            |                                                                |
| <b>Synthetic stopper<br/>Medium OTR</b>  | 6 months     | nd                                                       |                                                                | 1.4 $\pm$ 0.3                                             |                                                                |
|                                          | 12 months    | nd                                                       |                                                                | 21.7 $\pm$ 2.0                                            |                                                                |
|                                          | 24 months    | 1.3 $\pm$ 0.1 <sup>a</sup>                               |                                                                | 44.0 $\pm$ 6.1                                            |                                                                |
| <b>Synthetic stopper<br/>Medium+ OTR</b> | 6 months     | nd                                                       |                                                                | 6.2 $\pm$ 0.7                                             |                                                                |
|                                          | 12 months    | nd                                                       |                                                                | 45.4 $\pm$ 4.5                                            |                                                                |
|                                          | 24 months    | 2.6 $\pm$ 0.6 <sup>b</sup>                               |                                                                | 48.8 $\pm$ 3.4                                            |                                                                |

|                          |           |                 |                   |                          |                                                                   |
|--------------------------|-----------|-----------------|-------------------|--------------------------|-------------------------------------------------------------------|
| <b>BVS Saranex™</b>      | 6 months  | nd              | na <sup>2</sup>   | < 1                      | (Factor Closure $p<0.001$<br>Factor Time $p=0.675$ ) <sup>3</sup> |
|                          | 12 months | nd              |                   | $2.7 \pm 2.4$            |                                                                   |
|                          | 24 months | nd              |                   | $2.9 \pm 2.5$            |                                                                   |
| <b>BVS Tin Saran™</b>    | 6 months  | nd              |                   | nd                       |                                                                   |
|                          | 12 months | nd              |                   | nd                       |                                                                   |
|                          | 24 months | nd              |                   | nd                       |                                                                   |
| <b>MCA screw cap</b>     | 6 months  | nd              |                   | $16.4 \pm 7.0$           |                                                                   |
|                          | 12 months | < 1             |                   | $27.7 \pm 16.2$          |                                                                   |
|                          | 24 months | < 1             |                   | $29.4 \pm 5.8$           |                                                                   |
| <b>Plastic screw cap</b> | 6 months  | nd              | $2.4 \pm 0.9$     | (Factor Time $p=0.026$ ) |                                                                   |
|                          | 12 months | nd              | $3.7 \pm 0.1$     |                          |                                                                   |
|                          | 24 months | nd              | $6.3 \pm 0.4$     |                          |                                                                   |
| <b>Glass stopper</b>     | 6 months  | nd              | $36.0 \pm 18.7^a$ | ns                       |                                                                   |
|                          | 12 months | $5.0 \pm 1.0^a$ | $62.5 \pm 32.5^a$ |                          |                                                                   |
|                          | 24 months | $3.6 \pm 0.8^a$ | $59.1 \pm 11.7^a$ |                          |                                                                   |

<sup>1</sup> – if Test for Equality of Variances (Levene's) resulted in:  $p>0.05$ , then ANOVA was applied;  $p<0.05$ , then Kruskal-Wallis Test was applied.

<sup>2</sup> – not applicable because of non-detectable or non-quantifiable values of  $d_5$ -TCA content in wine.

<sup>3</sup> – BVS Tin Saran™ screw caps are not included because of non-detectable values of  $d_5$ -TCA content in these wine samples.

**Supplementary Table 2.** Results of ANOVA (or Kruskal-Wallis test) for *releasable d<sub>5</sub>-TCA* content in bottle closure extracts grouped according to their types. The values are means of three replicates  $\pm$  standard deviations. Small letters denote significant differences in ANOVA according to the Tukey's test (ns>0.05; \* $p\leq 0.05$ ; \*\* $p<0.01$ ; \*\*\* $p<0.001$ )

| Type of closure                                                      | Storage time | <i>d<sub>5</sub>-TCA</i> in extract (ng/L)<br>at <i>Medium conditions</i> | Significance in ANOVA<br>(in Kruskal-Wallis test) <sup>1</sup> | <i>d<sub>5</sub>-TCA</i> in extract (ng/L)<br>at <i>Intense conditions</i> | Significance in ANOVA<br>(in Kruskal-Wallis test) <sup>1</sup> |                              |    |
|----------------------------------------------------------------------|--------------|---------------------------------------------------------------------------|----------------------------------------------------------------|----------------------------------------------------------------------------|----------------------------------------------------------------|------------------------------|----|
| <b>Natural cork HQ</b><br>( <i>Outer part</i> )                      | 12 months    | 39.4 $\pm$ 14.7                                                           | (Factor Closure $p=0.013$<br>Factor Time $p=0.272$ )           | 40.9 $\pm$ 27.6                                                            | (Factor Closure $p=0.368$<br>Factor Time $p=0.165$ )           |                              |    |
|                                                                      | 24 months    | 39.4 $\pm$ 14.6                                                           |                                                                | 11.2 $\pm$ 1.2                                                             |                                                                |                              |    |
| <b>Natural cork BQ</b><br>( <i>Outer part</i> )                      | 12 months    | nd                                                                        |                                                                | 31.9 $\pm$ 55.3                                                            |                                                                |                              |    |
|                                                                      | 24 months    | 12.8 $\pm$ 2.2                                                            |                                                                | 11.1 $\pm$ 1.9                                                             |                                                                |                              |    |
| <b>Agglomerated cork HQ</b><br>( <i>Outer part</i> )                 | 12 months    | 27.6 $\pm$ 22.8                                                           |                                                                | nd                                                                         |                                                                |                              |    |
|                                                                      | 24 months    | 35.1 $\pm$ 28.9                                                           |                                                                | 16.8 $\pm$ 1.2                                                             |                                                                |                              |    |
| <b>Agglomerated cork BQ</b><br>( <i>Outer part</i> )                 | 12 months    | 34.6 $\pm$ 11.8                                                           |                                                                | nd                                                                         |                                                                |                              |    |
|                                                                      | 24 months    | 41.9 $\pm$ 17.0                                                           |                                                                | 16.4 $\pm$ 2.2 <sup>a</sup>                                                |                                                                |                              |    |
| <b>Synthetic stopper</b><br><b>Low OTR</b> ( <i>Outer part</i> )     | 12 months    | 9.4 $\pm$ 3.2                                                             |                                                                | (Factor Closure $p=0.003$<br>Factor Time $p=0.353$ )                       |                                                                | 62.2 $\pm$ 8.8 <sup>b</sup>  | ** |
|                                                                      | 24 months    | 11.2 $\pm$ 4.1                                                            |                                                                |                                                                            |                                                                | 31.2 $\pm$ 1.8 <sup>a</sup>  |    |
| <b>Synthetic stopper</b><br><b>Medium OTR</b> ( <i>Outer part</i> )  | 12 months    | 9.7 $\pm$ 2.4                                                             |                                                                |                                                                            |                                                                | 68.5 $\pm$ 8.3 <sup>b</sup>  |    |
|                                                                      | 24 months    | 11.3 $\pm$ 3.2                                                            |                                                                |                                                                            |                                                                | 34.0 $\pm$ 3.9 <sup>a</sup>  |    |
| <b>Synthetic stopper</b><br><b>Medium+ OTR</b> ( <i>Outer part</i> ) | 12 months    | 46.7 $\pm$ 12.3                                                           |                                                                | 74.7 $\pm$ 5.7 <sup>b</sup>                                                |                                                                |                              |    |
|                                                                      | 24 months    | 52.3 $\pm$ 16.1                                                           |                                                                | 37.7 $\pm$ 2.5 <sup>a</sup>                                                |                                                                |                              |    |
| <b>BVS Saranex™</b><br>( <i>Liner</i> )                              | 12 months    | nd                                                                        | ns <sup>2</sup>                                                | 17.1 $\pm$ 9.5 <sup>ab</sup>                                               | *                                                              |                              |    |
|                                                                      | 24 months    | nd                                                                        |                                                                | 5.7 $\pm$ 5.0 <sup>a</sup>                                                 |                                                                |                              |    |
| <b>BVS Tin Saran™</b><br>( <i>Liner</i> )                            | 12 months    | nd                                                                        |                                                                | 27.6 $\pm$ 10.5 <sup>b</sup>                                               |                                                                |                              |    |
|                                                                      | 24 months    | nd                                                                        |                                                                | 6.2 $\pm$ 0.4 <sup>a</sup>                                                 |                                                                |                              |    |
| <b>MCA screw cap</b><br>( <i>Liner</i> )                             | 12 months    | 4.8 $\pm$ 2.2 <sup>a</sup>                                                |                                                                |                                                                            |                                                                | 24.3 $\pm$ 8.6 <sup>ab</sup> |    |
|                                                                      | 24 months    | 1.2 $\pm$ 1.0 <sup>a</sup>                                                |                                                                |                                                                            |                                                                | 17.9 $\pm$ 0.9 <sup>ab</sup> |    |

|                                                     |           |                        |                 |                        |                              |
|-----------------------------------------------------|-----------|------------------------|-----------------|------------------------|------------------------------|
| <b>Plastic screw cap</b><br>( <i>Sealing ring</i> ) | 12 months | nd                     | na <sup>3</sup> | 3.8 ± 1.7 <sup>a</sup> | ns                           |
|                                                     | 24 months | nd                     |                 | 3.4 ± 1.3 <sup>a</sup> |                              |
| <b>Glass stopper</b><br>( <i>Sealing ring</i> )     | 12 months | 8.1 ± 0.9 <sup>b</sup> | **              | 64.5 ± 4.6             | (Factor Time <i>p</i> =0.05) |
|                                                     | 24 months | 3.7 ± 0.5 <sup>a</sup> |                 | 24.3 ± 0.2             |                              |

<sup>1</sup> – if Test for Equality of Variances (Levene's) resulted in:  $p > 0.05$ , then ANOVA was applied;  $p < 0.05$ , then Kruskal-Wallis Test was applied.

<sup>2</sup> – ANOVA was performed for extracts with MCA screw caps 12 months and 24 months of storage.

<sup>3</sup> – not applicable because of non-detectable or non-quantifiable values of *d*<sub>5</sub>-TCA content in extracts.

### Data Processing

Calculation of means ( $\pm$  standard deviations) were performed using Microsoft Office (Version 15.0.5153.1000, Microsoft Corporation, Redmond, Washington, DC, USA). Where *d*<sub>5</sub>-TCA values were below the LOD, they were considered to be “0 ng/L” for the calculation of means. Statistical analysis was performed using JASP software (Version 0.16, University of Amsterdam, Netherlands). Analysis of variance (ANOVA) was carried out with the Tukey HSD test for post hoc comparison to discriminate among the means of *d*<sub>5</sub>-TCA content in wine (Supplementary Table 1) and *releasable d*<sub>5</sub>-TCA content of bottle closure extracts (Supplementary Table 2). The values for ANOVA analysis were grouped according to bottle closure types. If ANOVA assumptions were not fulfilled (as shown by the Levene tests with  $p < 0.05$  for equality of variance), the nonparametric Kruskal-Wallis Test was applied (Supplementary Tables 1 and 2).
